# Supplementary material
Source: PubMed Central journal article supplement (PMC9464676)
Supplement: NIHMS1808048-supplement-1.pdf [file NIHMS1808048-supplement-1.pdf]

Supplementary Table 1. Daily estimates of nutrient intake from foods.

|                                    | Mean (SD)*      | Median* |
|------------------------------------|-----------------|---------|
| Calories, kcal                     | 1695.4 (602.1)  | 1655.1  |
| Total fat, % kcal                  | 34.6 (6.7)      | 34.4    |
| Monounsaturated fat, % kcal        | 13.6 (3.3)      | 13.3    |
| Saturated fat, % kcal              | 11.1 (2.7)      | 10.8    |
| Total Protein, % kcal              | 17.7 (3.4)      | 17.5    |
| Animal Protein, % total protein    | 67.2 (10.0)     | 68.5    |
| Carbohydrates, % kcal              | 47.7 (7.6)      | 47.7    |
| DHA, mg per 1000 kcal              | 100.7 (94.1)    | 73.0    |
| EPA, mg per 1000 kcal              | 71.4 (101.3)    | 37.0    |
| α-Linolenic acid, mg per 1000 kcal | 720.0 (456.4)   | 654.2   |
| Fiber, g per 1000 kcal             | 11.2 (3.2)      | 11.0    |
| Lutein and zeaxanthin, mcg         | 3238.0 (2641.6) | 2486.9  |
| β-Carotene, mcg                    | 3876.8 (2677.1) | 3126.6  |
| Vitamin B2, mg                     | 2.0 (0.8)       | 1.9     |
| Vitamin B6, mg                     | 2.0 (0.8)       | 1.9     |
| Vitamin B12, mcg                   | 6.4 (4.0)       | 5.6     |
| Total folate, mcg                  | 404.2 (176.8)   | 379.3   |
| Calcium, mg                        | 703.2 (337.5)   | 642.2   |
| Magnesium, mg                      | 299.6 (112.6)   | 294.4   |
| Zinc, mg                           | 10.8 (4.6)      | 10.0    |
| Vitamin C, mg                      | 107.4 (61.8)    | 100.2   |
| Vitamin D, mcg                     | 4.8 (3.4)       | 4.0     |
| Vitamin E, mg                      | 7.3 (3.7)       | 6.6     |

Abbreviations: AREDS2=Age-Related Eye Disease Study 2; DHA=docosahexaenoic acid; EPA=eicosapentaenoic acid; kcal=kilocalorie; SD=standard deviation

\* The data represent intake from foods, i.e., excluding intake from supplements. Specifically, they do not include oral supplement intake from the AREDS2 randomization (whereby one quarter of participants were assigned to daily DHA/EPA, one quarter to lutein/zeaxanthin, one quarter to both, and one quarter to placebo). Similarly, they do not include oral supplement intake from the secondary assignment, i.e., either the original AREDS formulation (beta-carotene, zinc, vitamin E, and copper) or a secondary randomization to four variations of the original AREDS formulation (elimination of beta-carotene, lowering of zinc dose, both, or neither). For the duration of the AREDS2, all participants agreed not to take supplements other than those assigned.
